# Supplementary material for: Reaction-induced phase separation in a bisphenol A-aniline benzoxazine–N,N′-(2,2,4-trimethylhexane-1,6-diyl)bis(maleimide)–imidazole blend: the effect of changing the concentration on morphology
Source: Royal Society of Chemistry journal article supplement (doi:10.1039/c3cp54960g), 2014-01-01
Supplement: c3cp54960g.pdf [file c3cp54960g.pdf]

## Supporting Information

for Physical Chemistry Chemical Physics

### Reaction-induced phase separation in a Bisphenol A-aniline benzoxazine/*N,N'*-(2,2,4-trimethylhexane-1,6-diyl)bis(maleimide)/imi- dazole blend: the Effect of Changing the Concentration on Morphology

Zhi Wang, Qichao Ran, Rongqi Zhu and Yi Gu\*

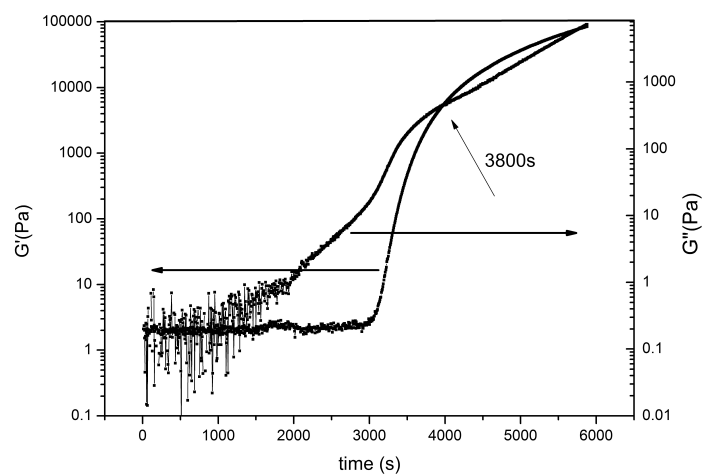

Figure S1 Rheological behavior of BTI123 at 120 °C
